# Supplementary material for: Defining the relative and combined contribution of CTCF and CTCFL to genomic regulation
Source: PubMed Central journal article supplement (PMC7212617; doi:10.1186/s13059-020-02024-0), 2020-05-11
Supplement: 13059_2020_2024_MOESM1_ESM.pdf [file 13059_2020_2024_MOESM1_ESM.pdf]

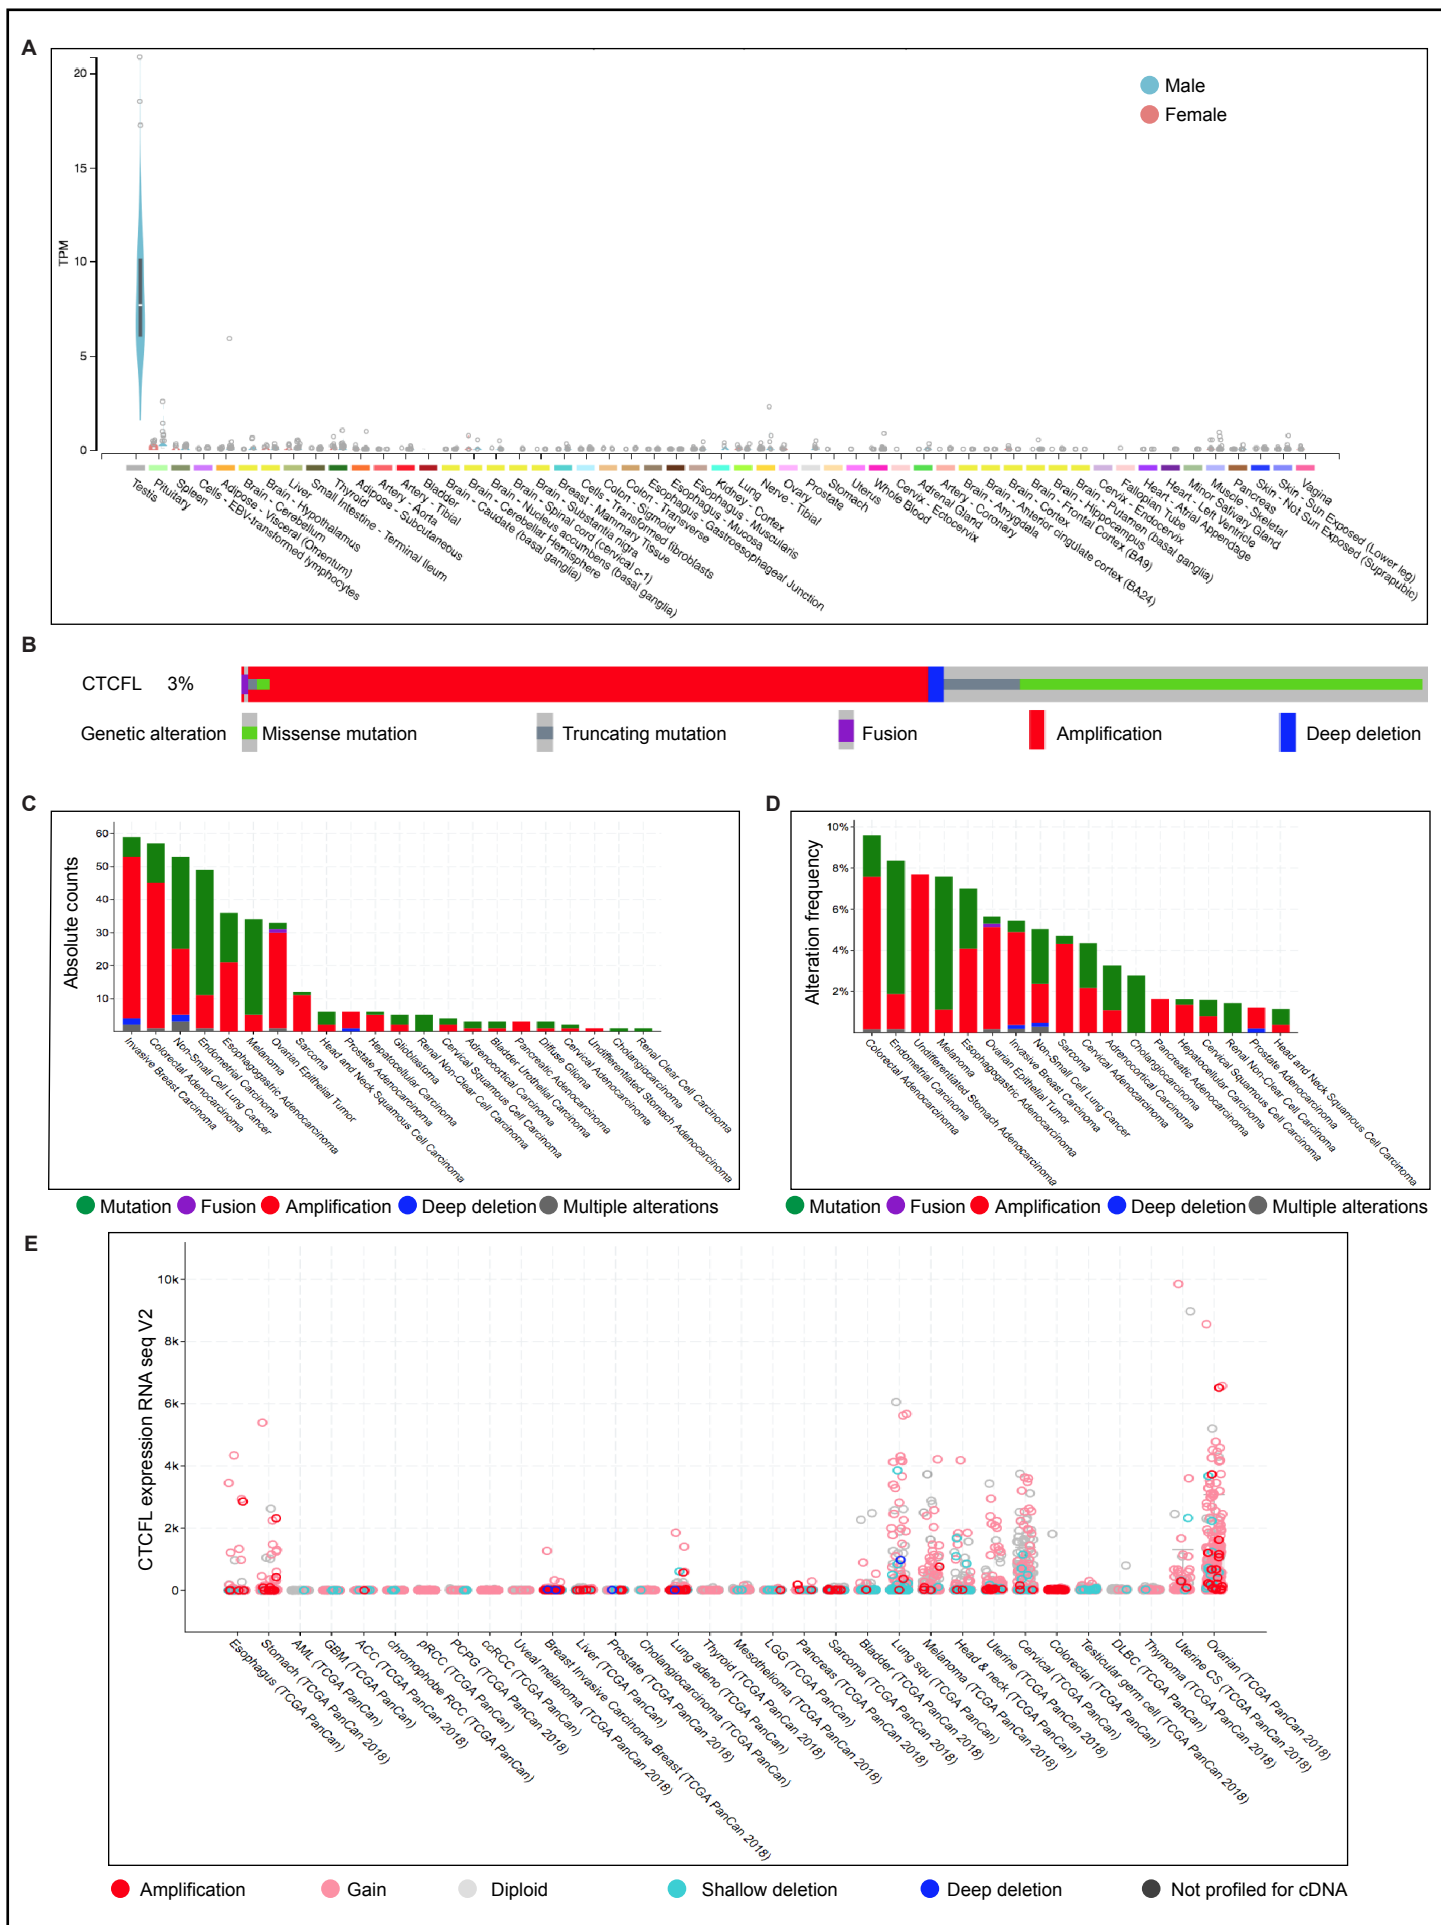

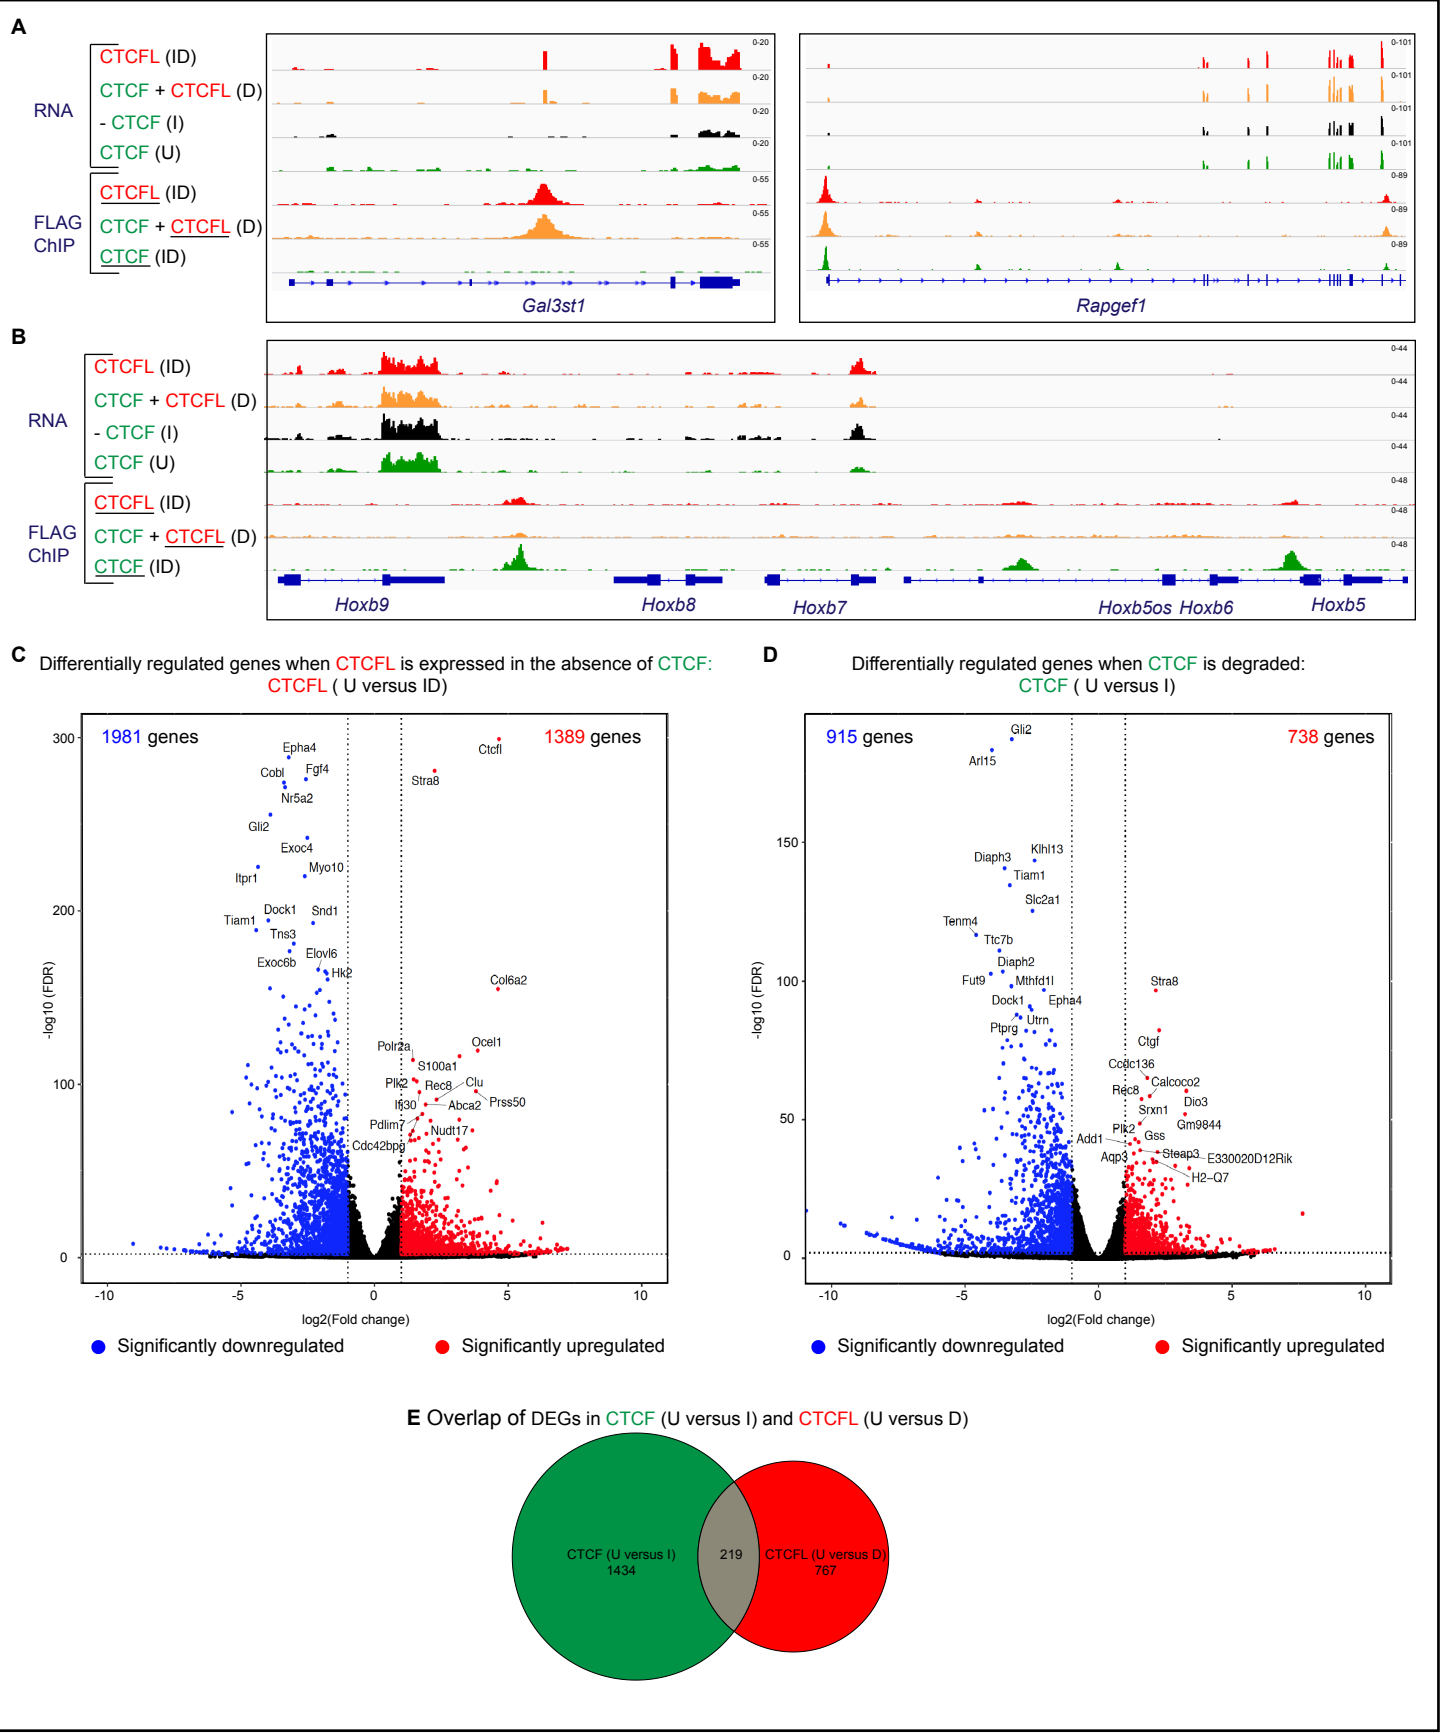

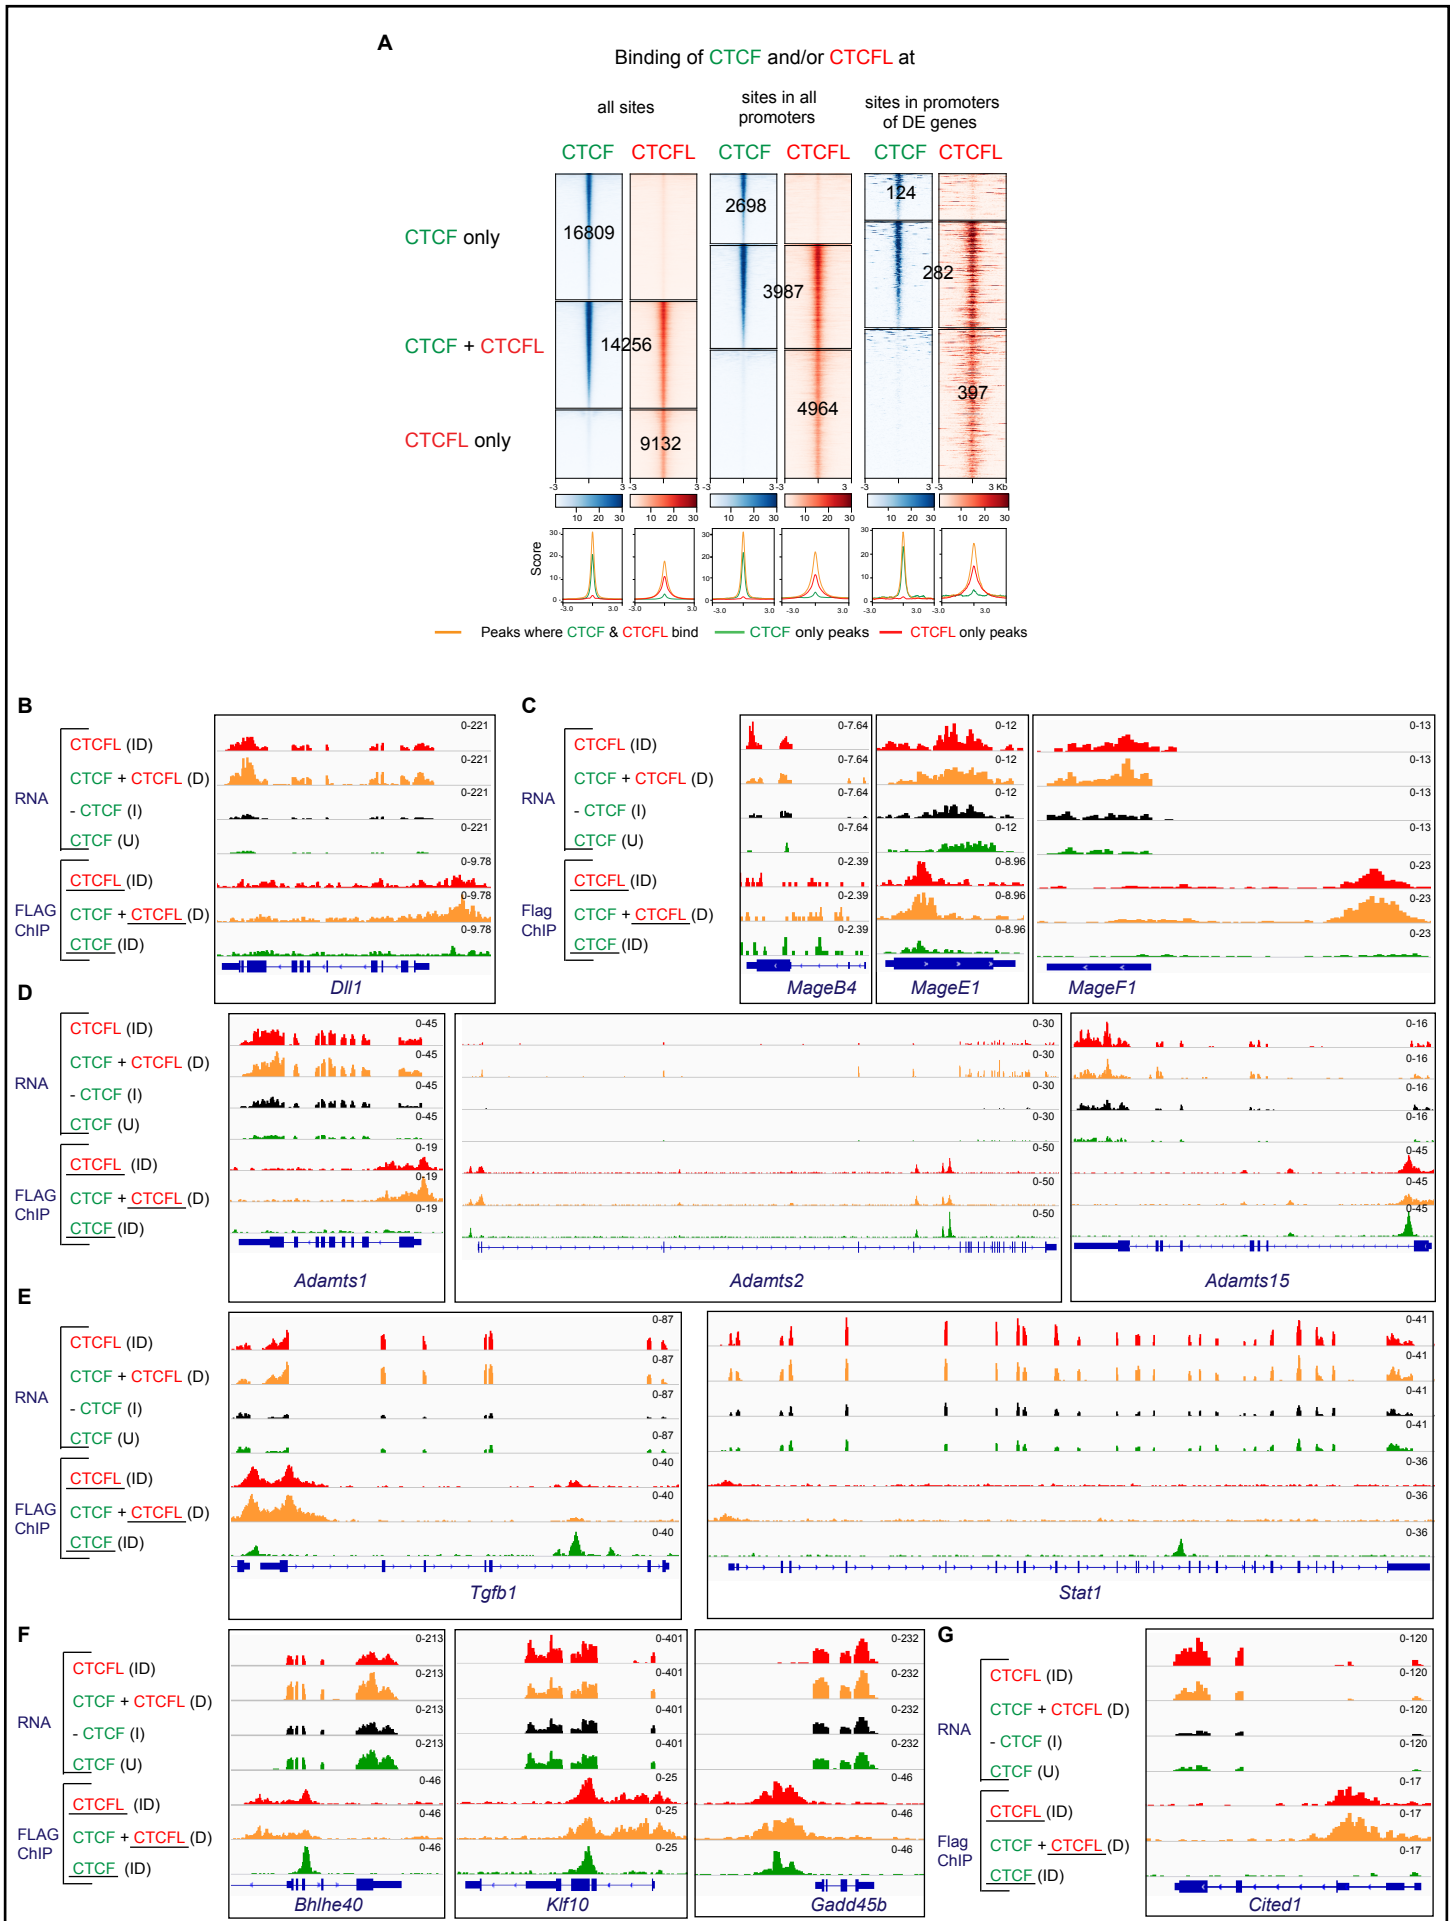

A

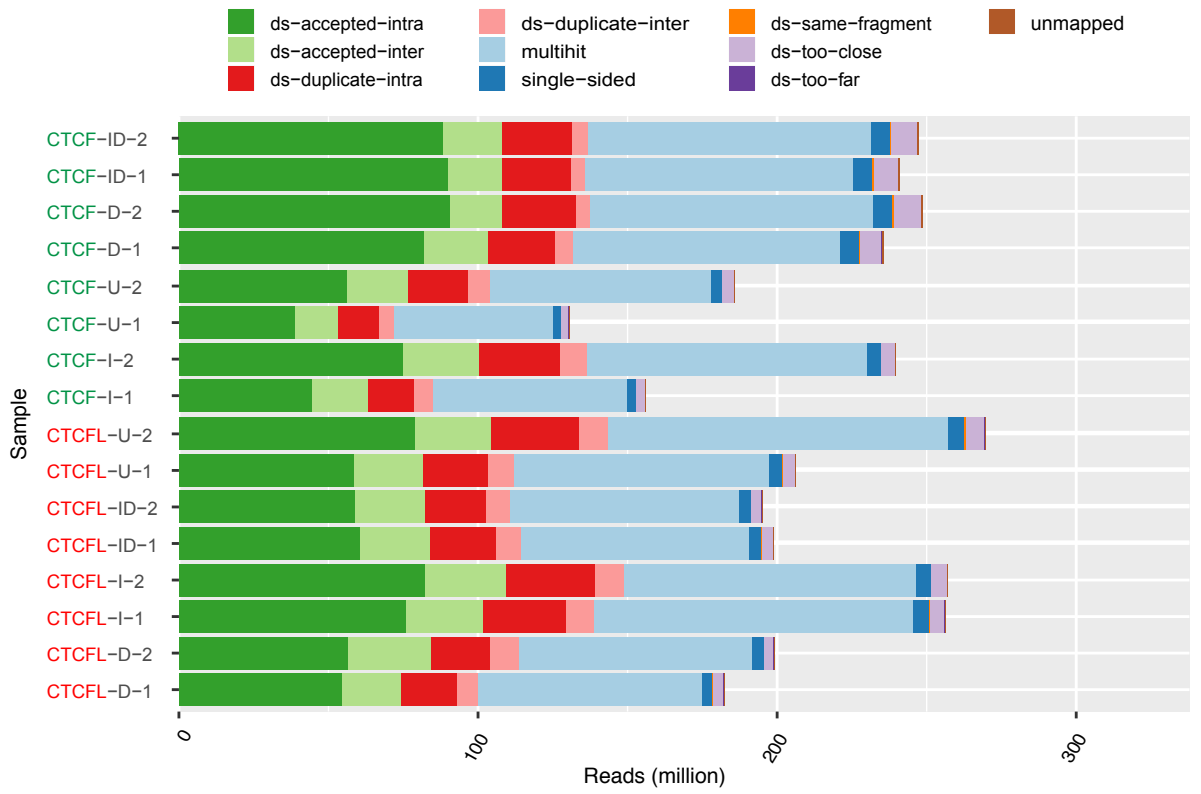

B

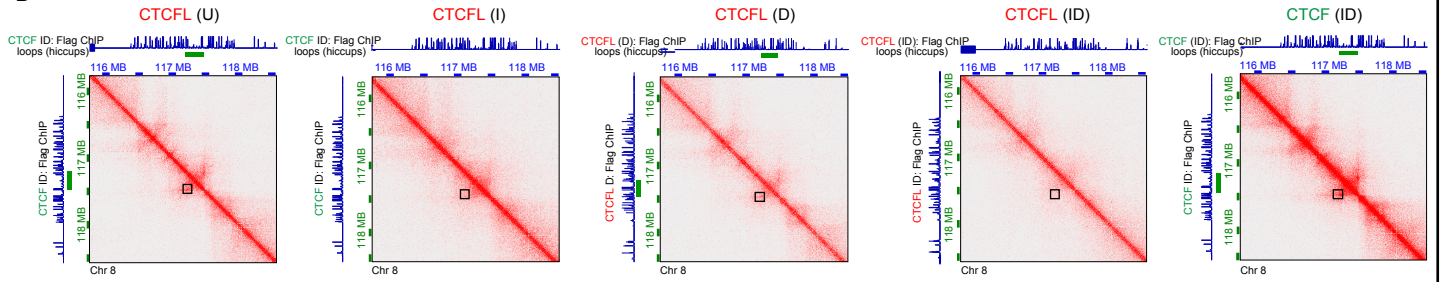



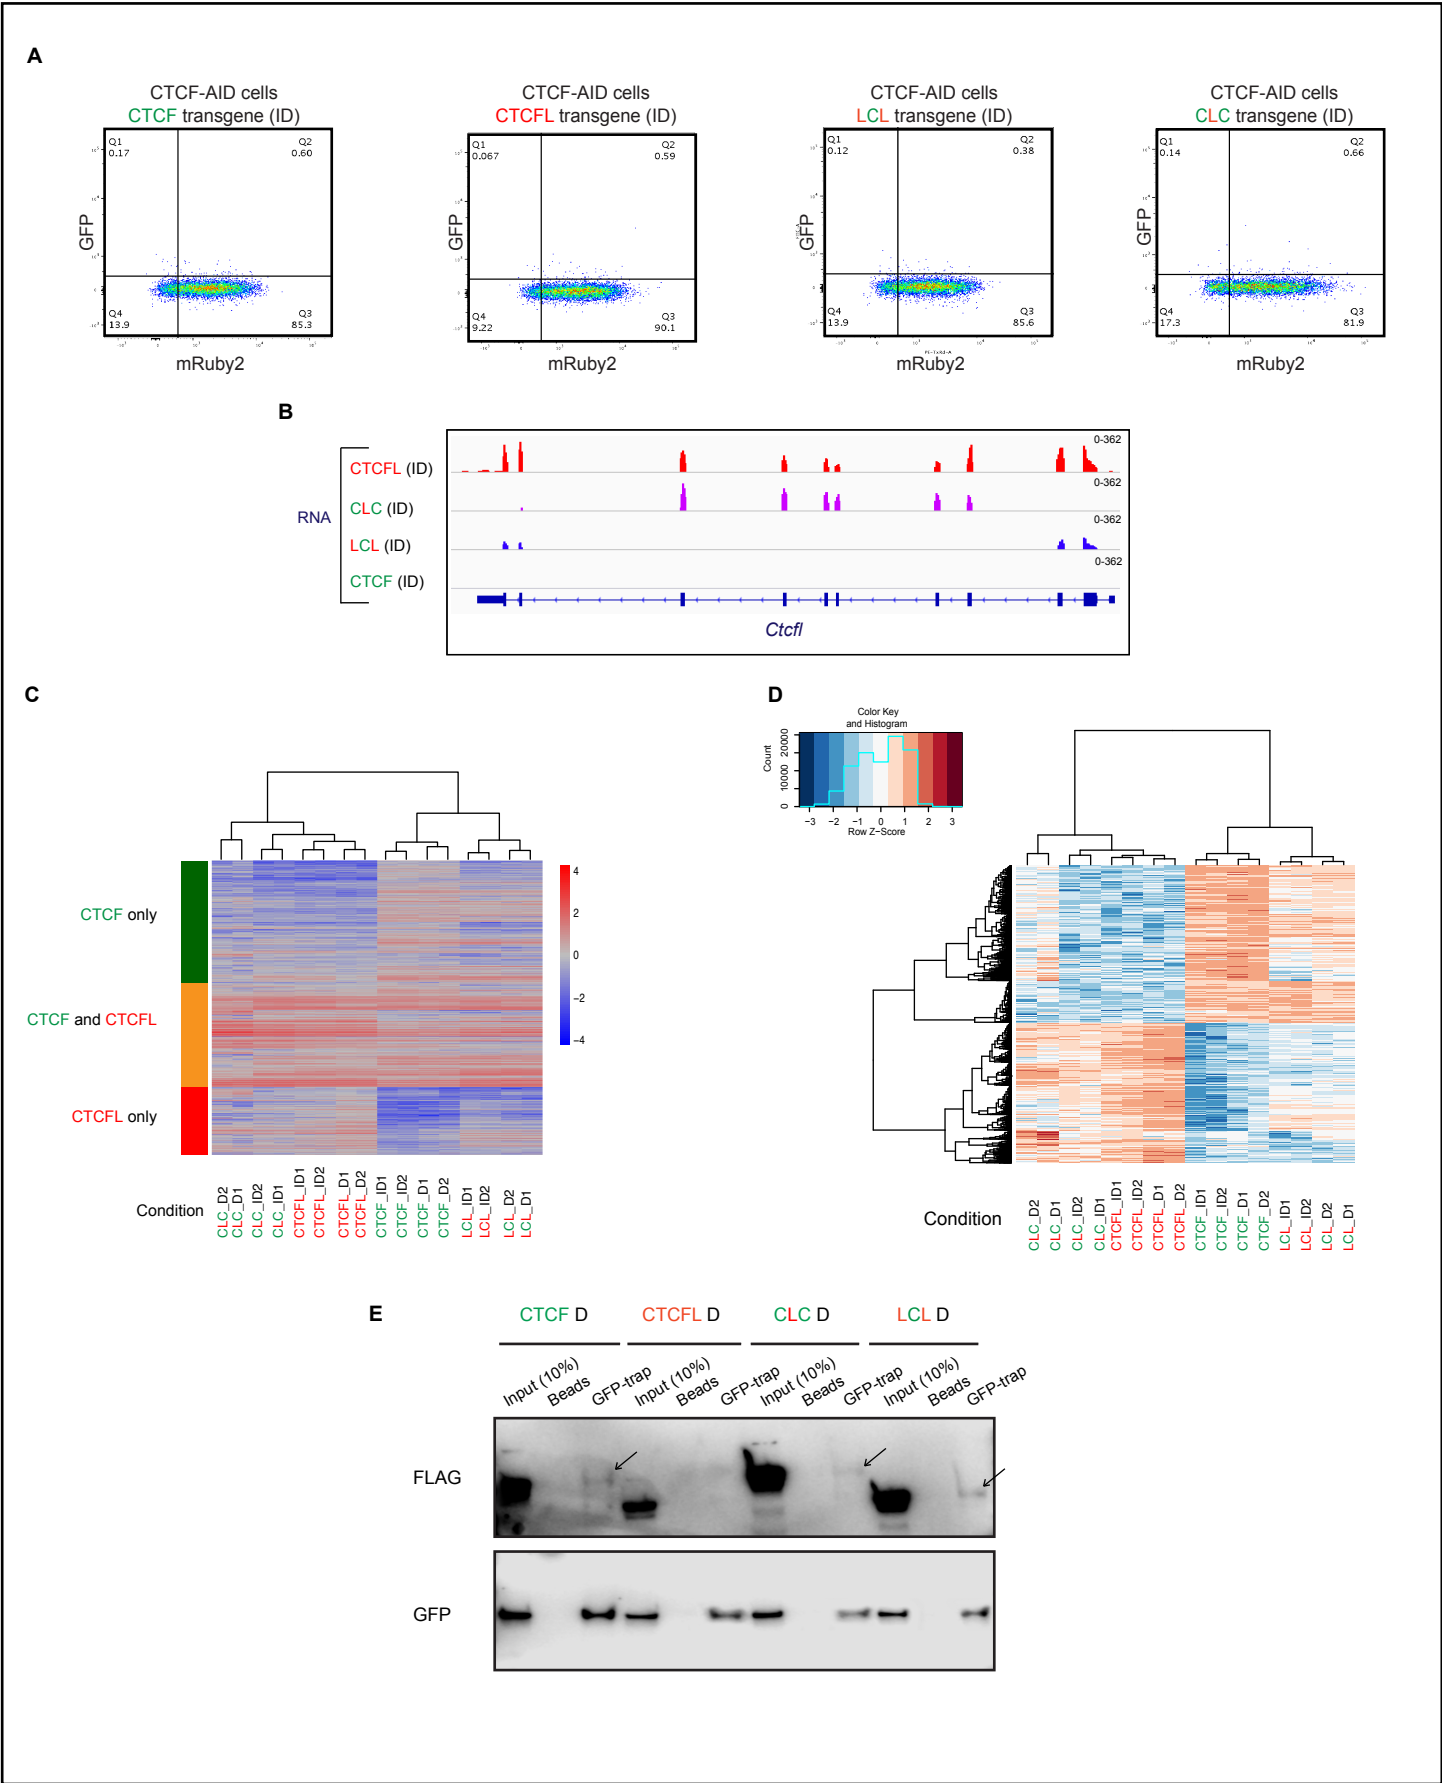

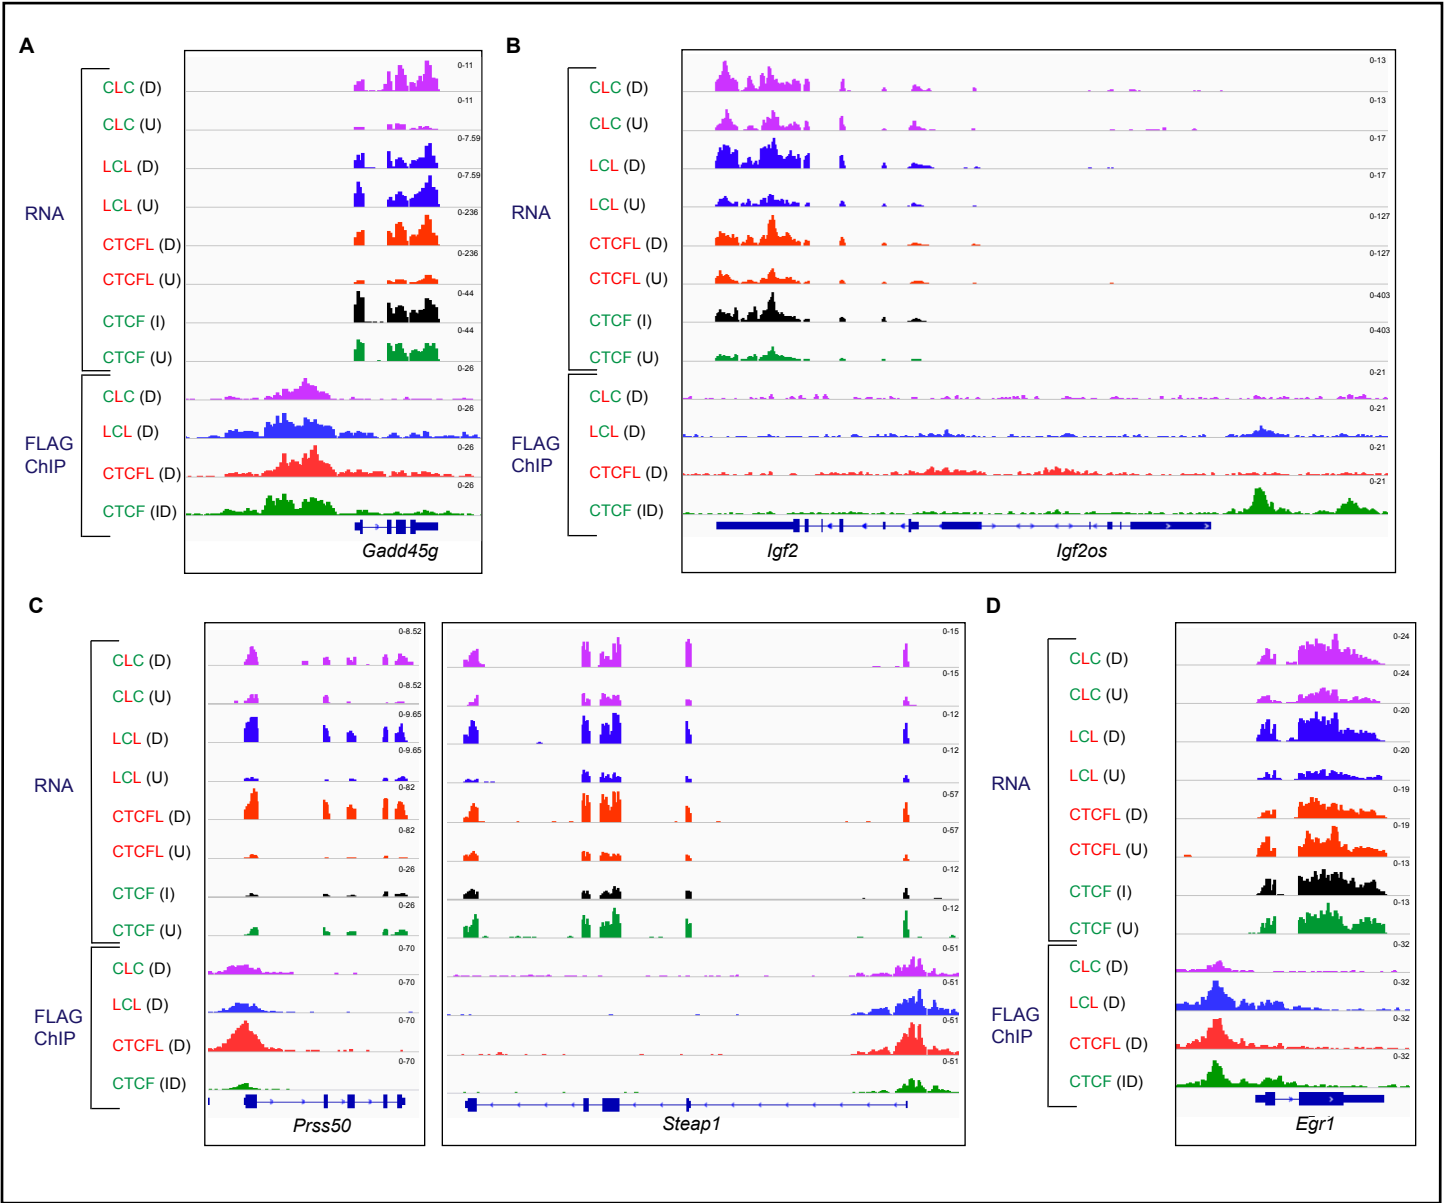

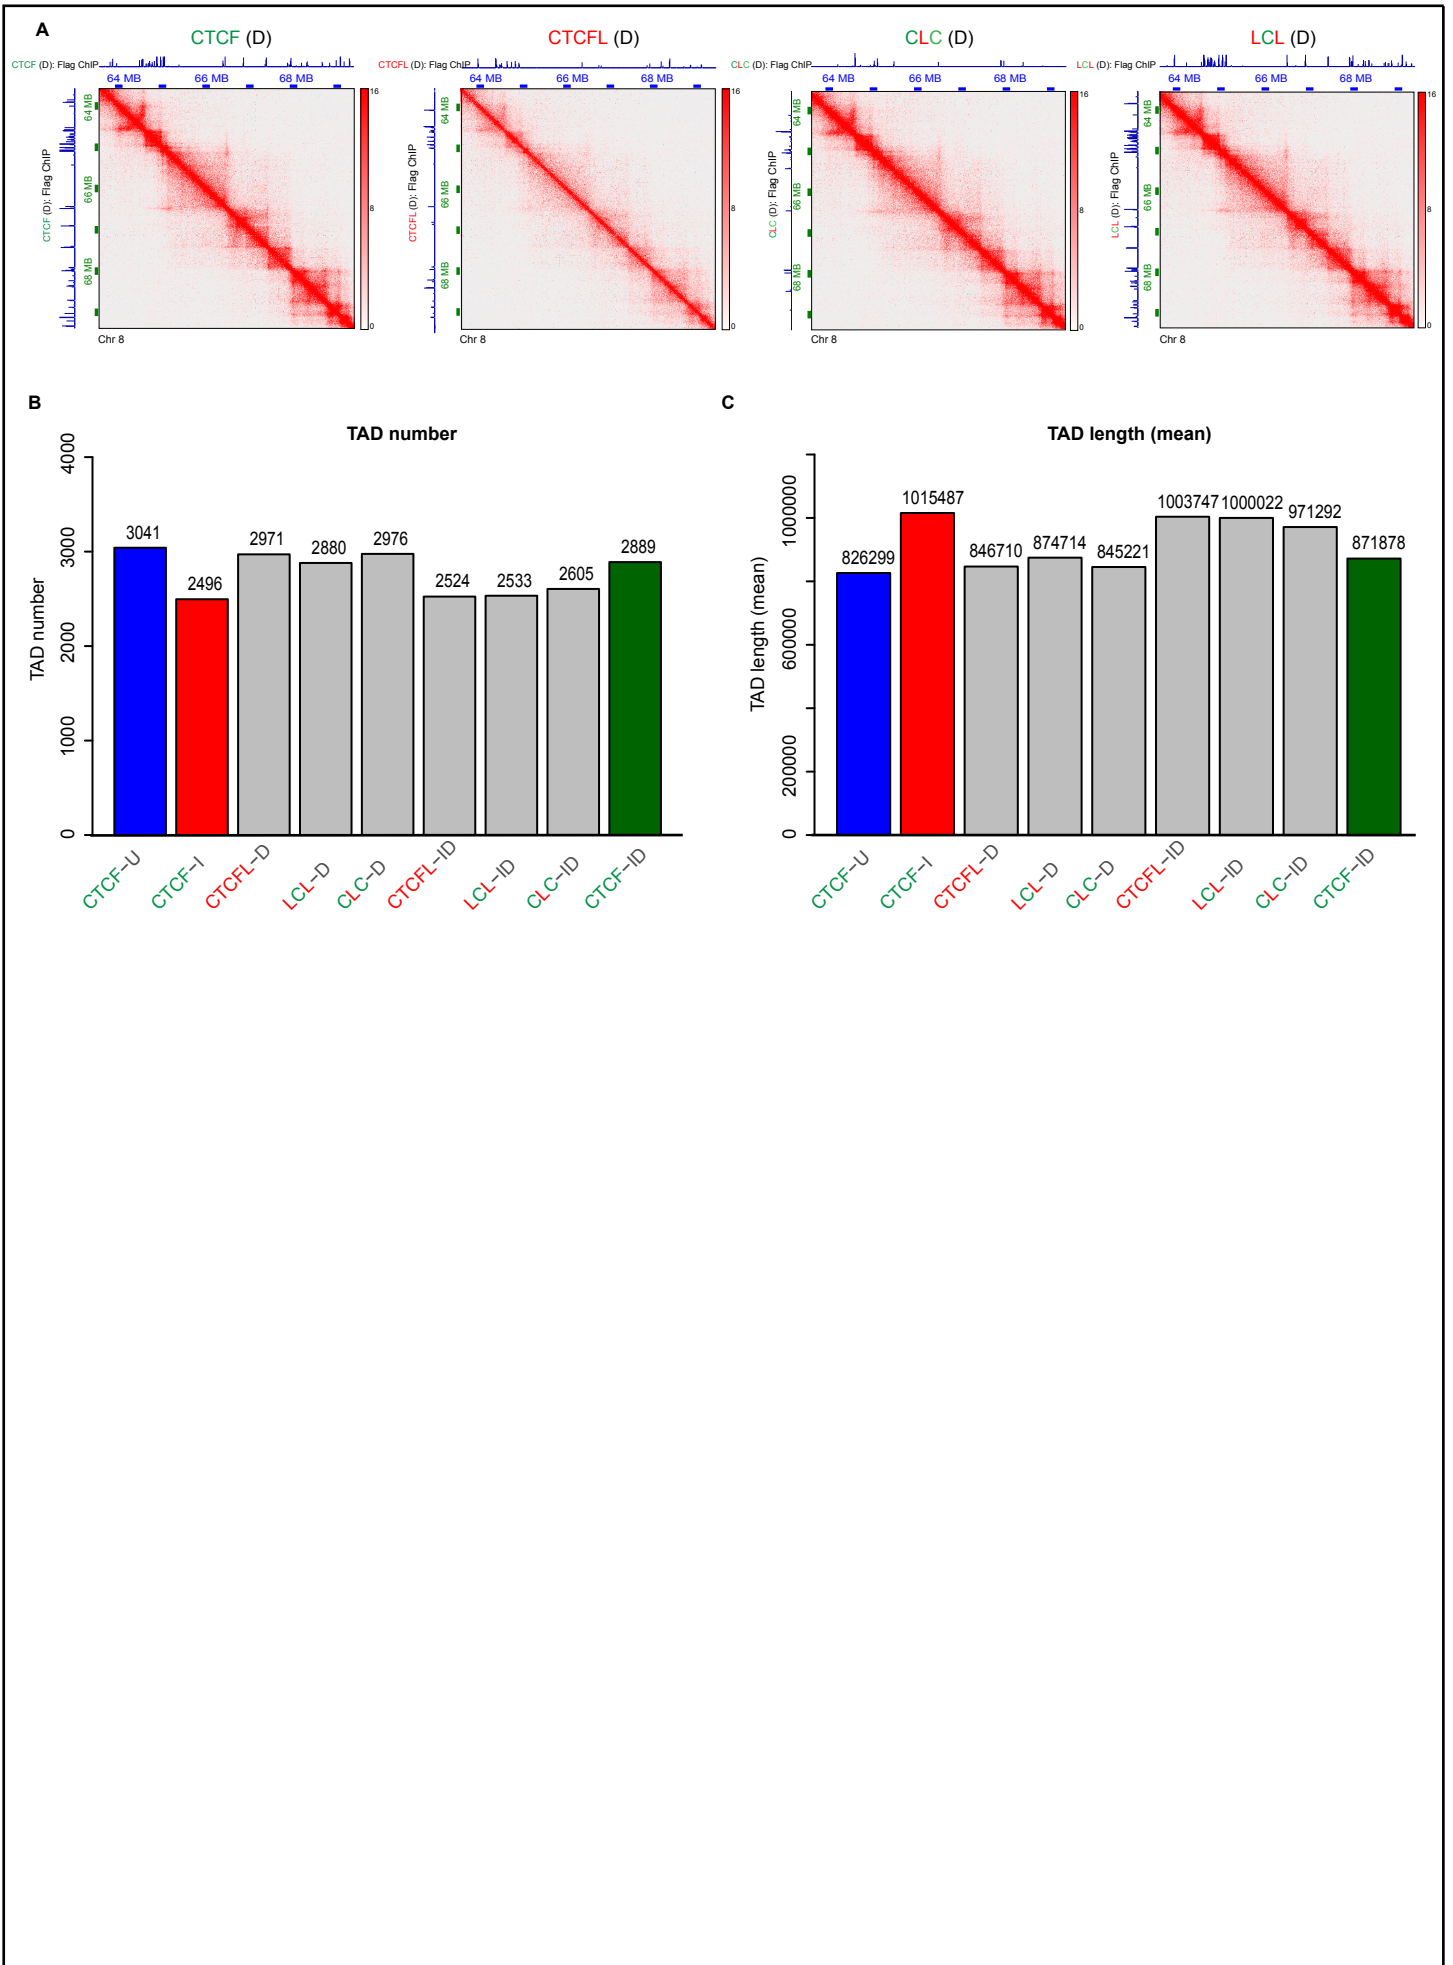

## Supplementary Figure Legends

**Fig S1. CTCFL is genetically altered and aberrantly expressed in numerous cancers. A** CTCFL is expressed only in testes in healthy individuals. Gene expression data for CTCFL (ENSG00000124092.8) was retrieved from GtexPortal (GTEx Analysis Release V7; dbGaP Accession phs000424.v7.p2). Data is sorted by median expression on a linear scale with males marked by blue and females by pink. **B** *CTCFL* is altered in 3% of cancer patients/samples profiled in cBioportal. Data was retrieved from Oncoprint of cBioPortal. The distribution of various alterations (missense mutation, truncations, fusion, amplification and deletion) in *CTCFL* in cancer are shown. As of 06/30/19, 3% of cancer patients profiled in cBioPortal had an alteration in *CTCFL*, the ratio of altered / profiled being 382 / 10950. **C, D** *CTCFL* is amplified across several cancer types. Alterations such as mutation, fusion, amplification and deletion reported in cancer patients are color coded. Absolute count of the patients (**C**) and alteration frequency in percentage (**D**) in various cancer types are shown. **E** *CTCFL* expression (RNA seq) and copy number variation in several cancer types. Data is sorted by median on a linear scale. Copy number alterations such as amplification, gain, diploid, deep and shallow deletion etc. are color coded.

**Fig S2. CTCF and CTCFL bind to and regulate distinct sets of genes. A, B** IgV tracks showing RNA-seq in all four conditions (U, I, D and ID) in cells harboring the CTCFL transgene. ChIP-seq using FLAG antibody to detect the binding of transgenic CTCFL and CTCF. Binding and expression at *Gal3st1* and *Rapgef1* (**A**) and the *Hoxb* cluster (**B**) is shown. **C, D** Volcano plots showing differentially expressed genes in the wild-type (U) versus CTCFL expressing mESCs in the absence of endogenous CTCF (ID condition) (**C**) and wild type (U) versus CTCF degraded (I condition) cells (**D**). Red and blue points mark the genes with significantly increased or decreased expression respectively (FDR<0.01). The x-axis shows the log<sub>2</sub> fold-change in expression and the y-axis the log

10 (False discovery rate) of a gene being differentially expressed. The number of genes that are significantly up or downregulated are indicated in either case. **E** Venn diagrams showing the overlap of differentially expressed genes (DEG) between U versus I condition and U versus D condition (in cells harboring the CTCFL transgene).

**Fig S3. CTCFL activates cancer testes antigens (CTA) and components of cancer relevant signaling pathways. A** Distribution of peaks bound exclusively by CTCF and/or CTCFL at all binding sites, binding sites in promoters and in promoters of differentially expressed genes (DEG) when CTCFL is expressed (D condition). Average profiles are shown below the corresponding heatmaps. **B-G** IgV tracks showing RNA-seq in all four conditions (U, I, D and ID) in cells harboring the CTCFL transgene. ChIP-seq was performed using a FLAG antibody to detect the binding of transgenic CTCFL and CTCF. Binding of CTCFL and CTCF and transcriptional changes are shown for *Dll1* (**B**) *MageB4*, *MageE1*, *MageF1* (**C**) *Adamts1*, *Adamts2*, *Adamts15* (**D**) *Tgfb1* and *Stat1* (**E**) *Bhlhe40*, *Klf10* and *Gadd45b* (**F**) and *Cited1* (**G**).

**Fig S4. The impact of CTCFL on 3D chromatin organization. A** Hi-C analysis was performed in cells harboring CTCF and CTCFL transgenes under U, I, D and ID conditions in replicates. Statistical report showing the number (in millions) of reads assigned to the different categories following the filtering of reads using HiC bench [73]. Only “ds accepted-intra” and “ds accepted inter” reads were used for further analysis. **B** Snapshot of HiC data from Juicebox showing loss of loops when CTCF is degraded (CTCFL-I) and rescue under conditions of CTCFL-D and CTCF-ID, but not CTCFL-ID. The loop regions from Hiccups and Flag ChIPs corresponding to the respective cell lines are shown along the x-and y-axis.

**Fig S5. The role of CTCF and CTCFL zinc fingers and N/C terminal regions in site specific binding. A** Flow cytometry confirms the comparable level of mRuby2 expression of transgenic CTCF,

CTCF, LCL and CLC. **B** IgV tracks of RNA-seq showing expression of the transgenes. At the *Ctcf* locus, peaks are seen at the exons corresponding to the swapped regions with the chimeric proteins, all exons with *Ctcf* and no peaks with the *Ctcf* transgene. **C, D** Heatmap showing the clustering of ChIP-seq signals where CTCF, CTCFL, CLC and LCL bind in the presence (D) and absence (ID) of endogenous CTCF. The peak sites corresponding to CTCF only, CTCFL only and CTCF and CTCFL overlapping sites were used for the analysis. These were sorted by site in (**C**) but not in (**D**). **E**. Immunoprecipitation of endogenous GFP tagged CTCF using GFP-Trap and blotting with FLAG antibody demonstrate an interaction between CTCF and transgenic FLAG tagged CTCF, CLC and LCL but not CTCFL. The blot with the GFP antibody shows the pull down of endogenous CTCF in cells expressing the different transgenes.

**Fig S6. Impact of fusion proteins on gene expression. A-D** IgV tracks showing RNA-seq of indicated conditions in cells harboring CTCF, CTCFL, CLC or LCL transgene under the indicated conditions. ChIP-seq using FLAG antibody was used to detect the binding of transgenes. Binding and expression at *Gadd45g* (**A**), *Igf2* (**B**), *Prss50*, *Steap1* (**C**) and *Egr1* (**D**) is shown.

**Fig S7. The impact of fusion proteins on chromatin organization. A** Snapshot of Hi-C data from Juicebox corresponding to Chr 8: 63,616,214-69,456,200 8: 63,566,214- 69,406,200 at 10 kb resolution. Cells harboring CTCF, CTCFL, CLC or LCL transgenes were treated with Dox as indicated for 4 days. The corresponding FLAG ChIPs are shown on the x-and y-axis as indicated. **B** The total number (**B**) and mean length (**C**) of TADs called in cells harboring transgenic CTCF, CTCFL, CLC and LCL when treated with D or ID as indicated for 4 days. Untreated (U) as well as CTCF degraded (I) cells harboring CTCF transgenes serve as positive and negative controls.
