# Supplementary material for: Defining the relative and combined contribution of CTCF and CTCFL to genomic regulation
Source: PubMed Central journal article supplement (PMC7212617; doi:10.1186/s13059-020-02024-0), 2020-05-11
Supplement: 13059_2020_2024_MOESM4_ESM.pdf [file 13059_2020_2024_MOESM4_ESM.pdf]

| Transgene | Condition | Experiments             | Figure                                                                   |
|-----------|-----------|-------------------------|--------------------------------------------------------------------------|
| CTCF      | U         | RNA seq                 | Fig. 5a, 5d<br>Figure S2B, S2C, S6                                       |
|           |           | HiC                     | Figure S4A, S7B, S7C                                                     |
|           | I         | RNA seq                 | Fig. 5a, 5d<br>Figure S2B, S2C, S6                                       |
|           |           | HiC                     | Fig 6c, 6d, 7g-i<br>Figure S4A, S7B, S7C                                 |
|           | D         | FLAG ChIPmentation      | Fig. 2b, 4c, 7d                                                          |
|           |           | RAD21 ChIPmentation     | Fig. 2b, 4c                                                              |
|           |           | HiC                     | Fig 3<br>Figure S4A, S5B, S5C, S7A                                       |
|           | ID        | FLAG ChIPmentation      | Fig. 2a-e, 4d-h, 7e<br>Figure S2D, S2E, S3A-E,<br>S3G, S5B, S6, S7B, S7C |
|           |           | HiC                     | Fig 3, 6a, 6a-d, 7g-i<br>Figure S4A, S4B, S5B, S5C                       |
|           |           | ID +<br>RNase treatment | FLAG ChIPmentation                                                       |
| CTCF      | U         | RNA seq                 | Fig. 2a, 2f, 5a, 5d<br>Figure S2A, S2C, S2D,<br>S2E, S3A-E, S6           |
|           |           | HiC                     | Fig 3<br>Figure S4A, S4B                                                 |
|           | I         | RNA seq                 | Fig. 2a<br>Figure S2D, S2E, S3A-E                                        |
|           |           | HiC                     | Fig 3<br>Figure S4A, S4B                                                 |
|           | D         | RNA seq                 | Fig. 2a, 2f, 5a, 5d<br>Figure S2C, S2D, S2E,<br>S3A-E, S6                |
|           |           | FLAG ChIPmentation      | Fig. 2a-e, 4c, 7d<br>Figure S2D, S2E, S3A-E,<br>S3G                      |
|           |           | RAD21 ChIPmentation     | Fig. 2b, 4c                                                              |
|           |           | HiC                     | Fig 3<br>Figure S4A, S4B, S5B,<br>S5C, S7A, S7B, S7C                     |
|           | ID        | RNA seq                 | Fig. 2a<br>Figure S2A, S2D, S2E,<br>S3A-E                                |
|           |           | FLAG ChIPmentation      | Fig. 2a-e, 4d-h, 7e                                                      |

|     |                      |                     |                                                    |
|-----|----------------------|---------------------|----------------------------------------------------|
|     |                      |                     | Figure S2D, S2E, S3A-E, S5B, S6                    |
|     |                      | RAD21 ChIPmentation | Fig. 2b                                            |
|     |                      | HiC                 | Fig 3, 6a-c<br>Figure S4A, S4B, S5B, S5C, S7B, S7C |
|     | ID + RNase treatment | FLAG ChIPmentation  | Fig. 2g                                            |
| CLC | U                    | RNA seq             | Fig. 5a, 5c, 5f<br>Figure S6                       |
|     | D                    | FLAG ChIPmentation  | Fig. 4c, 4g, 4h, 7d, S6                            |
|     |                      | RAD21 ChIPmentation | Fig. 4c                                            |
|     |                      | RNA seq             | Fig. 5a, 5c<br>Figure S6                           |
|     |                      | HiC                 | Figure S5B, S5C, S7A, S7B, S7C                     |
|     | ID                   | FLAG ChIPmentation  | Fig. 4d-h, 7e<br>Figure S5B                        |
|     |                      | RNA seq             | Fig. 5d, 5f                                        |
|     |                      | HiC                 | Fig. 6a-d<br>Figure S5B, S5C, S7B, S7C             |
| LCL | U                    | RNA seq             | Fig. 5a, 5b, 5e<br>Figure S6                       |
|     | D                    | FLAG ChIPmentation  | Fig. 4c, 4g, 4h<br>Figure S6                       |
|     |                      | RAD21 ChIPmentation | Fig. 4c                                            |
|     |                      | RNA seq             | Fig. 5a, 5b<br>Figure S6                           |
|     |                      | HiC                 | Figure S5B, S5C, S7A, S7B, S7C                     |
|     | ID                   | FLAG ChIPmentation  | Fig. 4d-h                                          |
|     |                      | RNA seq             | Fig. 5d, 5e                                        |
|     |                      | HiC                 | Fig. 6a-c, 6d<br>Figure S5B, S5B, S5C, S7B, S7C    |
| CLL | D                    | FLAG ChIPmentation  | Fig. 7d                                            |
|     | ID                   | FLAG ChIPmentation  | Fig. 7e                                            |
|     |                      | HiC                 | Fig. 7g-i                                          |
| LLC | D                    | FLAG ChIPmentation  | Fig. 7d                                            |
|     | ID                   | FLAG ChIPmentation  | Fig. 7e                                            |
